# Supplementary material
Source: PubMed Central journal article supplement (PMC5378500)
Supplement: supp_5.1.E1_2016-0076_Original_submission.pdf [file supp_5.1.E1_2016-0076_Original_submission.pdf]

# ADDED SUGAR IN THE CANADIAN FOOD SUPPLY: A DESCRIPTIVE ANALYSIS

Rachel B Acton BSc<sup>1</sup>, Lana Vanderlee PhD<sup>1</sup>, Erin P Hobin PhD<sup>1,2</sup>, David Hammond PhD<sup>1\*</sup>

1. School of Public Health and Health Systems, University of Waterloo, Waterloo, Ontario, Canada N2L 3G1
2. Public Health Ontario, Toronto, Ontario, Canada M5G 1V2

\* Corresponding Author

LHN 1716

University of Waterloo

200 University Ave W

Waterloo, ON N2L 3G1

david.hammond@uwaterloo.ca

(519) 888-4567 ext. 36462

## Contributor's Statement:

RBA participated in designing the study, developing the research questions, conducting the analyses, and writing the initial draft of the document. LV and DH participated in designing the study methods, and developing the research questions. EPH participated in acquiring the data. All authors participated in editing the document, and have read and approved the final document.

**Word Count:** 2,428

**Tables:** 2      **Figures:** 0

1  
2  
3  
4  
5  
6  
7  
8  
9  
10  
11  
12  
13  
14  
15  
16  
17  
18  
19  
20  
21  
22  
23  
24  
25  
26  
27  
28  
29  
30  
31  
32  
33  
34  
35  
36  
37  
38  
39  
40  
41  
42  
43  
44  
45  
46  
47  
48  
49  
50  
51  
52  
53  
54  
55  
56  
57  
58  
59  
60**32 ABSTRACT**

33 **BACKGROUND:** Excess consumption of added sugars has been associated with a variety of health  
34 problems, but there is little information available characterizing added sugar in the Canadian food  
35 supply. This study examined the presence and types of added sugars in the Canadian packaged food  
36 supply.

37 **METHODS:** Our study analyzed a comprehensive database of food product information from a major  
38 national grocery retailer. We searched the ingredients lists of over 40,000 packaged food products  
39 available for sale in March 2015 for a variety of added sugar terms. Proportions of food products  
40 containing added sugar were identified overall and within food product categories. Differences in total  
41 sugar content were identified between food products with and without added sugar.

42 **RESULTS:** Overall, 66% of the packaged food products analyzed contained at least one added sugar.  
43 The added sugar term ‘sugar’ (and its variations) appeared the most frequently, followed by ‘dextrose’.  
44 Added sugar presence and total sugar content varied within many product categories, but were  
45 consistently higher in expected categories such as ‘Beverages’. Mean total sugar content was  
46 significantly higher in products with added sugar than in those without, both overall ( $p<0.0001$ ) and  
47 within most product subcategories ( $p<0.01$ ).

48 **INTERPRETATION:** Approximately two thirds of the current Canadian packaged food supply  
49 contains added sugar, similar to recent patterns estimated for the US food supply. This study provides a  
50 baseline characterization of added sugar in the Canadian food supply, which can be used to assess  
51 outcomes of future changes to sugar labeling policies in Canada.

## 52 INTRODUCTION

53 Added sugar has emerged as an important public health issue. The term “added sugar” generally refers  
54 to sugars (or ingredients that functionally substitute for sugars) that are added to foods and beverages  
55 during preparation or processing, unlike intrinsic sugars that are found within the structure of intact  
56 fruits and vegetables, or sugars naturally occurring in milk.<sup>1,2</sup> Higher intakes of added sugars threaten  
57 the nutrient quality of diets by replacing essential nutrients and increasing the overall energy density of  
58 diets.<sup>3</sup> There is a growing body of evidence indicating that excess added sugar consumption is  
59 associated with a variety of health problems, including heart disease,<sup>4,5,6</sup> stroke,<sup>6</sup> obesity,<sup>7,8,9,10,11</sup>  
60 diabetes,<sup>12,13,14,15,16</sup> high blood cholesterol,<sup>17,18</sup> cancer,<sup>19</sup> and dental caries.<sup>20</sup> The World Health  
61 Organization recommends reducing intake of free sugars to below 10% of total energy intake, and to  
62 less than 5% for additional health benefits.<sup>21</sup> Similarly, the Heart and Stroke Foundation of Canada  
63 recommends individuals to limit their consumption of added sugars to a maximum of 10% of total daily  
64 calorie intake, as do the 2015-2020 Dietary Guidelines for Americans in the United States.<sup>22,23</sup>

65  
66 An increasing proportion of the food supply is categorized as processed and packaged foods,<sup>24</sup> which  
67 tend to be high in added sugars.<sup>25</sup> Worldwide, daily per capita consumption of caloric sweetener (a  
68 term which excludes sugars added from fruit juice) increased by 74 calories from 1962 to 2000.<sup>26</sup>  
69 Limited data are available on Canadians’ added sugar consumption, but it has been estimated to fall  
70 between 11 and 13% of total energy intake.<sup>27,28</sup> To date, there is little information about the levels of  
71 added sugar content in the food supply in general. A recent study by Popkin and Hawkes examined  
72 added sugar in the US, and found that 68% of packaged food and beverages purchased in 2013  
73 contained added sugars, after excluding low-calorie sweeteners.<sup>29</sup> To our knowledge, there are  
74 currently no estimates of the added sugar levels in the Canadian food supply. The primary objective of  
75 the current study was to examine the presence and types of added sugars in the Canadian food supply  
76 through an analysis of a comprehensive database of food product information from a major national  
77 grocery retailer in Canada. In particular, the study sought to estimate the proportion of packaged food  
78 products with added sugar both overall and by food category, identify the frequency of different types  
79 of added sugars, and identify differences in total sugar content between food products with and without  
80 added sugar.

## 82 METHODS

### 83 Design

1  
2 84 The study analysed a comprehensive database containing food product information of over 60,000  
3  
4 85 items available for sale in March 2015 across all banner stores of a major national grocery retailer. The  
5  
6 86 data provided UPC information, food product categories, product descriptions, Nutrition Facts table  
7  
8 87 information, and the ingredients lists of each food product. For the purposes of this study, only  
9  
10 88 packaged foods were included in the analysis. Products identified as fresh fruits or vegetables, fresh  
11  
12 89 meat, raw ingredients (water, baking ingredients, coffee and tea, fats and oils, etc.), or non-food items  
13  
14 90 (natural health products, nutrition and protein supplements, etc.) were excluded. After exclusions,  
15  
16 91 40,829 packaged food products were analyzed in the current study.  
17  
18 92

18 93 To assess the comprehensiveness of the set of food products included in this database, we compared the  
19  
20 94 UPCs of the 40,829 products to supermarket transaction data recorded in the period of March 1 to 15,  
21  
22 95 2015. Over 150 million sales transactions were recorded in the retailers' stores across Canada over this  
23  
24 96 two-week period, and included 60,563 unique UPCs. The results of this comparison indicated that 58%  
25  
26 97 of the products analyzed in this paper were sold in the first two weeks of March. Of the 42% of  
27  
28 98 products not sold in the first two weeks of March, most were likely to be seasonal or infrequently sold  
29  
30 99 food items. The March sales transaction data also included 26,711 UPC codes that were not among the  
31  
32 100 40,829 food products analyzed in this paper. The majority of these were non-food items (51%) or  
33  
34 101 discontinued products (9%). The remaining were products for which nutritional information had not yet  
35  
36 102 been provided (37%).  
37

### 38 104 **Measures**

39  
40 105 The 40,829 food products were sorted into 10 categories (Milk and Dairy; Protein Foods; Mixed  
41  
42 106 Dishes; Grains; Baked Goods; Snacks and Sweets; Beverages; Condiments, Sauces and Spreads; Infant  
43  
44 107 Formula and Baby Food; Fruits and Vegetables) and 30 subcategories, as seen in Table 1. These  
45  
46 108 categories were adapted from those used in the What We Eat in America dietary intake component of  
47  
48 109 the National Health and Nutrition Examination Survey (NHANES).<sup>30</sup>  
49

50 111 There is varying terminology used to describe sugars in the literature.<sup>31</sup> Traditionally, the term “added  
51  
52 112 sugars” refers to all sugars added to foods, including honey and syrups, but does not necessarily include  
53  
54 113 fruit juices.<sup>31</sup> The World Health Organization has adopted the term “free sugars” with the intention of  
55  
56 114 creating a more precise definition, and define it as “all monosaccharides and disaccharides added to  
57  
58 115 foods by the manufacturer, cook or consumer, plus sugars naturally present in honey, syrups and fruit  
59  
60

1  
2  
3 116 juices”.<sup>32</sup> The World Health Organization’s definition for free sugars was used to identify added sugars  
4 117 in the current study. We searched for 30 different added sugar terms in the ingredients lists of the food  
5  
6 118 products: agave, malt/barley malt, cane juice, caramel, carob, corn sweetener, corn syrup, date paste,  
7  
8 119 dextran, dextrose, diatase, ethyl maltol, Florida crystals, fructose, fruit juice concentrate, galactose,  
9  
10 120 glucose, glucose-fructose, high fructose corn syrup, honey, lactose, maltodextrin, maltose, molasses,  
11 121 nectar, panaocha, sucrose, sugar, syrup, and treacle.<sup>33,34,35</sup> High-level terms such as ‘sugar’ or ‘syrup’  
12  
13 122 contained multiple varieties of added sugars (e.g. “icing sugar”, “grape sugar”, “raw sugar”; “rice  
14  
15 123 syrup”, “golden syrup”). Terms more commonly recognized on their own, such as “corn syrup”, were  
16  
17 124 included in independent categories. The search method accounted for sugars with overlapping names,  
18  
19 125 such as “fructose” and “high-fructose corn syrup”, and excluded unwanted non-sugar ingredients that  
20 126 might be identified with the search terms, such as “*honeydew melon*” or “*caramelized onions*”. We  
21  
22 127 excluded sugar alcohols such as sorbitol, glycerol and erithritol from our search, as they contain  
23  
24 128 insignificant amounts of energy, as done in previous research.<sup>29,36</sup>

25 129  
26  
27 130 “Total sugar”, as opposed to added sugar, indicates the total grams of sugar in one serving of a food  
28  
29 131 product, including added, intrinsic, and milk sugars.<sup>2</sup> We identified total sugar using an existing  
30  
31 132 variable in the database that provided grams of sugar per serving, as listed on the products’ Nutrition  
32  
33 133 Facts tables.

### 34 134 35 36 135 **Statistical Analysis**

37  
38 136 This study utilized ‘COUNTIF’ functions in Excel 2013 to search for each added sugar term, including  
39  
40 137 searches for variations in spelling and punctuation. The researchers used SPSS statistics software  
41  
42 138 (version 22.0; IBM Corp., Armonk, NY, USA; 2014) to perform descriptive statistics (counts, means,  
43 139 standard deviations, and proportions) and to conduct t-tests to analyze significant differences in total  
44  
45 140 sugar between products with and without added sugars.

## 46 47 141 48 49 142 **RESULTS**

50 143 Overall, 66% of the 40,829 packaged food products contained at least one added sugar in their  
51  
52 144 ingredients list.

### 53 54 145 55 56 146 **Types of added sugars**

1  
2  
3 147 Table 2 displays the frequency and proportion at which each different added sugar term appeared in the  
4 148 products examined. The most common added sugar term was 'sugar', identified in 54% of all food  
5  
6 149 products analyzed. The next five most frequently appearing terms (dextrose, glucose, glucose-fructose,  
7  
8 150 corn syrup, and maltodextrin) were found in 45% of all food products, collectively. The terms  
9  
10 151 'dextran', 'diatase', 'Florida crystals', 'galactose', and 'panocha' were also included in the search  
11 152 strategy as potential added sugars, but they did not appear in any of the food products analysed.  
12  
13 153

### 14 15 154 **Sugar content**

16  
17 155 Table 1 displays the mean amount of total sugar present in products by subcategory. Overall, products  
18  
19 156 in the 'Beverages' category contained the highest mean levels of total sugar levels. The 'Milk and  
20 157 Dairy' and 'Snacks and Sweets' categories were highly variable in the total sugar levels across their  
21  
22 158 subcategories. 'Condiments, Sauces and Spreads', 'Infant Formula and Baby Food', and 'Fruits and  
23  
24 159 Vegetables' contained the next highest levels of total sugar. The remaining categories of 'Protein  
25  
26 160 Foods', 'Mixed Dishes', 'Grains' and 'Baked Goods' all contained relatively lower levels of total  
27 161 sugars in comparison to the other categories.  
28

29 162  
30  
31 163 Table 1 also displays the proportion of the foods in each subcategory that contained at least one added  
32  
33 164 sugar in their ingredients list, according to the search method. These results followed a similar pattern  
34  
35 165 to the mean total sugar described previously, with high proportions of added sugar in categories with  
36 166 high total sugar. Some notable exceptions included the 'cured meats', 'soups', 'pizza', 'Mexican', and  
37  
38 167 'breads' subcategories, in which a high proportion of the products contained added sugar, but the mean  
39  
40 168 total sugar content was relatively low.  
41

### 42 169 43 170 **Total sugar in products with and without added sugar**

44  
45 171 Table 1 presents the mean amount of total sugar found in products identified as having added sugar and  
46  
47 172 in those without, by subcategory. The overall mean total sugar in products with added sugar was  
48  
49 173 significantly higher than the overall total sugar in products without added sugar, at 11.0 g and 2.9 g  
50  
51 174 respectively ( $t = -80.830$ ;  $p < 0.0001$ ). There were also significant differences in total sugar content  
52 175 between products with and without added sugar within each of the subcategories ( $p < 0.01$  in all cases),  
53  
54 176 with the exception of 'pizza' ( $p = 0.75$ ) and 'Mexican' ( $p = 0.95$ ) subcategories.  
55

56 177

57  
58  
59  
60

1  
2 178 The search strategy resulted in 2,311 food products that contained “0 g” of total sugar per serving, but  
3  
4 179 were identified as having at least one added sugar in their ingredients list. This discrepancy may be  
5  
6 180 primarily explained by the fact that Canada’s Nutrition Facts table guidelines allow manufacturers to  
7  
8 181 list total sugar as 0 g if one serving of the food product contains less than 0.5 g of total sugar.<sup>37</sup>  
9  
10 182

## 11 183 **INTERPRETATION**

13 184 The results of the current study indicate that approximately two-thirds of the packaged food products  
14  
15 185 sold in a major Canadian supermarket retailer contain added sugar. These results are comparable to  
16  
17 186 estimates reported by Popkin and Hawkes in the US, and suggest a high level of consistency in added  
18  
19 187 sugar presence across the North American food supply.<sup>29</sup> The retailer analyzed in this study commands  
20 188 approximately one third of the Canadian supermarket market share, serving a large proportion of  
21  
22 189 shoppers in this country. Given the company’s widespread permeation across Canada, it is reasonable  
23  
24 190 to argue that the sample of over 40,000 food products analyzed in this study is a realistic representation  
25  
26 191 of the entire Canadian packaged food supply.

27 192  
28  
29 193 The added sugar term most commonly identified in ingredients lists (“sugar” and its variations) may be  
30  
31 194 familiar to consumers, but numerous lesser-known terms also appear frequently, which consumers may  
32  
33 195 not recognize as added sugars. This diverse terminology may pose a challenge for consumers trying to  
34  
35 196 identify whether or not a product contains added sugar. The presence of added sugar was highest in the  
36  
37 197 expected food products including candy, sweet bakery products, and soda, but was also very high in  
38  
39 198 food products that many consumers choose as “healthy” options, such as snack bars, cereal, and juice.  
40 199 Mean amounts of total sugar were highest in similar food categories to those that had a high presence  
41  
42 200 of added sugar. Foods that contain added sugar tend to have significantly higher total sugar contents  
43  
44 201 than those without added sugar. Some exceptions to this observation were the ‘pizza’ and ‘Mexican’  
45  
46 202 food product categories, both of which had very high proportions of products containing added sugar,  
47  
48 203 but relatively low mean total sugar contents. These discrepancies indicate that while the majority of the  
49  
50 204 products in those food categories do contain added sugar, the average amount of added and intrinsic  
51  
52 205 sugars across those products is very small.

53  
54 207 There is little known about consumers’ level of knowledge and awareness of added sugars in food  
55  
56 208 products. However, evidence does suggest consumers have several misunderstandings about sugars and  
57  
58 209 sugar processing, including confusion about the safest ways to consume sugars in a healthy diet, and  
59  
60

1  
2 210 the belief that sugar content of fruit juice is less of a health risk than soft drinks.<sup>38</sup> Further, around one-  
3  
4 211 quarter of young people cannot identify if there is added sugar present in a food item when there is no  
5  
6 212 added sugar information on Nutrition Facts tables.<sup>39</sup> In an effort to address the confusion over added  
7  
8 213 sugars, the US has recently finalized updates to their Nutrition Facts label that include requirements to  
9  
10 214 distinguish between intrinsic and added sugars, with a percent daily value (%DV) for added sugars  
11 215 based on the USDA recommendation that they not exceed 10% of total daily calories.<sup>40</sup> Health Canada  
12  
13 216 has also recently considered the addition of an added sugar value on Nutrition Facts tables, as well as a  
14  
15 217 reorganization of the ingredients list that would group all sugars together in a set of brackets, which  
16  
17 218 may aid consumers in finding and reading added sugars in the list of ingredients.<sup>41,42</sup>  
18  
19 219

## 20 220 **Limitations and Strengths**

21  
22 221 The products in this study come from the largest food retailer in Canada across of a range of  
23  
24 222 supermarket “banners”; however, the data does not include products from other retailers. Additionally,  
25  
26 223 the food product data used in this study were not linked with supermarket transaction data, therefore  
27 224 the results reflect what is available for purchase rather than sales weighted data on consumer  
28  
29 225 purchasing behaviours. Despite these limitations, the product database analyzed in the current paper  
30  
31 226 represents the largest database of pre-packaged foods in Canada of which we are aware.  
32  
33 227

34 228 Not all of the products in the food database were sold within a two-week period for which sales data  
35  
36 229 was available. However, there were no substantial differences between the presence of added sugar in  
37  
38 230 the 40,829 products analyzed (66.0% containing added sugar) and in the portion of those that were  
39  
40 231 verified as sold within March 1 to 15, 2015 (67.2% containing added sugar). The decision to include all  
41  
42 232 products reported in the food database (as opposed to only those sold during the two-week period) is  
43 233 that it provides a more comprehensive analysis of seasonal and non-seasonal products that may not be  
44  
45 234 captured in sales transactions over a single two-week time period.  
46  
47 235

48 236 The number of different ways in which added sugar is reported as an ingredient represents an additional  
49  
50 237 challenge. Efforts were undertaken to include all relevant ingredients; however, the search strategy may  
51  
52 238 have overlooked some new or rare terms for added sugar.  
53  
54 239

## 55 240 **Conclusions**



1  
2 241 A high proportion of pre-packaged foods in Canada contain added sugar. The current findings  
3  
4 242 underscore the prevalence of added sugar in the Canadian food supply, as well as the difficulty of  
5  
6 243 identifying added sugar content, which requires a detailed understanding of the many ways in which  
7  
8 244 added sugar is reported as an ingredient. In the absence of requirements to report added sugar levels in  
9  
10 245 nutrition labels, Canadian consumers lack the information necessary to act on public health  
11 246 recommendations to limit added sugar consumption.  
12  
13 247  
14  
15 248  
16  
17  
18  
19  
20  
21  
22  
23  
24  
25  
26  
27  
28  
29  
30  
31  
32  
33  
34  
35  
36  
37  
38  
39  
40  
41  
42  
43  
44  
45  
46  
47  
48  
49  
50  
51  
52  
53  
54  
55  
56  
57  
58  
59  
60

Confidential

## REFERENCES

1. Institute of Medicine of the National Academies (2002) Chapter 6, Dietary Carbohydrates: Sugars and Starches. In *Dietary Reference Intakes for Energy, Carbohydrate, Fiber, Fat, Fatty Acids, Cholesterol, Protein, and Amino Acids*, pp. 265-338. Washington, DC: The National Academies Press.
2. World Health Organization (2015) Guideline: sugars intake for adults and children. [http://apps.who.int/iris/bitstream/10665/149782/1/9789241549028\\_eng.pdf?ua=1](http://apps.who.int/iris/bitstream/10665/149782/1/9789241549028_eng.pdf?ua=1) (accessed December 2015).
3. Murphy P, Johnson R (2003) The scientific basis of recent US guidance on sugars intake. *Am J Clin Nutr* **78**, 827S-335S.
4. Yang Q, Zhang Z, Gregg EW *et al.* (2014) Added sugar intake and cardiovascular disease mortality among US adults. *JAMA Intern Med* **174**, 516-24.
5. Johnson RK, Appel LJ, Brands M *et al.* (2009) Dietary sugars intake and cardiovascular health: a scientific statement from the American Heart Association. *Circulation* **120**, 1011-20.
6. Liu S, Willett WC, Stampfer MJ *et al.* (2000) A prospective study of dietary glycemic load, carbohydrate intake, and risk of coronary heart disease in US women. *Am J Clin Nutr* **71**, 1455-61.
7. Bray GA, Nielsen SJ, Popkin BM (2004) Consumption of high-fructose corn syrup in beverages may play a role in the epidemic of obesity. *Am J Clin Nutr* **79**, 537-43.
8. Pollock NK, Bundy V, Kanto W *et al.* (2012) Greater fructose consumption is associated with cardiometabolic risk markers and visceral adiposity in adolescents. *J Nutr* **142**, 251-7.
9. Sievenpiper JL, de Souza RJ, Mirrahimi A *et al.* (2012) Effect of fructose on body weight in controlled feeding trials: a systematic review and meta-analysis. *Ann Intern Med* **156**, 291-304.
10. Te Morenga L, Mallard S, Mann J (2013) Dietary sugars and body weight: systematic review and meta-analyses of randomised controlled trials and cohort studies. *BMJ* **346**, e7492.
11. Wang H, Steffen LM, Zhou X *et al.* (2013) Consistency between increasing trends in added-sugar intake and body mass index among adults: the Minnesota Heart Survey, 1980-1982 to 2007-2009. *Am J Public Health* **103**, 501-7.
12. Basu S, Yoffe P, Hills N *et al.* (2013) The relationship of sugar to population-level diabetes prevalence: an econometric analysis of repeated cross-sectional data. *PLoS One* **8**, e57873.

- 1  
2 278 13. Cozma AI, Sievenpiper JL, de Souza RJ *et al.* (2012) Effect of fructose on glycemic control in  
3 279 diabetes: a systematic review and meta-analysis of controlled feeding trials. *Diabetes Care* **35**,  
4 280 1611-20.  
5  
6 281 14. Davis JN, Ventura EE, Weigensberg MJ *et al.* (2005) The relation of sugar intake to  $\beta$  cell function  
7 282 in overweight Latino children. *Am J of Clin Nutr* **82**, 1004-10.  
8  
9 283 15. Gross LS, Li L, Ford ES *et al.* (2004) Increased consumption of refined carbohydrates and the  
10 284 epidemic of type 2 diabetes in the United States: an ecologic assessment. *Am J Clin Nutr* **79**, 774-  
11 285 9.  
12  
13 286 16. Janket SJ, Manson JE, Sesso H *et al.* (2003) A prospective study of sugar intake and risk of type 2  
14 287 diabetes in women. *Diabetes Care* **26**, 1008-15.  
15  
16 288 17. Sievenpiper JL, Carleton AJ, Chatha S *et al.* (2009) Heterogeneous effects of fructose on blood  
17 289 lipids in individuals with type 2 diabetes: systematic review and meta-analysis of experimental  
18 290 trials in humans. *Diabetes Care* **32**, 1930-1937.  
19  
20 291 18. Welsh JA, Sharma A, Abramson JL *et al.* (2010) Caloric sweetener consumption and dyslipidemia  
21 292 among US adults. *JAMA* **303**, 1490-1497.  
22  
23 293 19. Larsson SC, Bergkvist L, Wolk A (2006) Consumption of sugar and sugar-sweetened foods and  
24 294 the risk of pancreatic cancer in a prospective study. *Am J Clin Nutr* **84**, 1171-1176.  
25  
26 295 20. Moynihan PJ, Kelly SAM (2014) Effect on caries of restricting sugars intake: Systematic review to  
27 296 inform WHO guidelines. *J Dent Res* **93**, 8-18.  
28  
29 297 21. World Health Organization (2015) Information note about intake of sugars recommended in the  
30 298 WHO guideline for adults and children.  
31 299 [http://www.who.int/nutrition/publications/guidelines/sugar\\_intake\\_information\\_note\\_en.pdf?ua=1](http://www.who.int/nutrition/publications/guidelines/sugar_intake_information_note_en.pdf?ua=1)  
32 300 (accessed December 2015).  
33  
34 301 22. Heart and Stroke Foundation of Canada (2014) Sugar and your health.  
35 302 [http://www.heartandstroke.com/site/apps/nlnet/content2.aspx?c=ikIQLcMWJtE&b=4016859&ct=](http://www.heartandstroke.com/site/apps/nlnet/content2.aspx?c=ikIQLcMWJtE&b=4016859&ct=14183373)  
36 303 [14183373](http://www.heartandstroke.com/site/apps/nlnet/content2.aspx?c=ikIQLcMWJtE&b=4016859&ct=14183373) (accessed December 2015).  
37  
38 304 23. U.S. Department of Health and Human Services and U.S. Department of Agriculture (2015) 2015-  
39 305 2020 Dietary Guidelines for Americans, 8<sup>th</sup> Edition. [http://health.gov/dietaryguidelines/2015-](http://health.gov/dietaryguidelines/2015-2020)  
40  
41  
42  
43  
44  
45  
46  
47  
48  
49  
50  
51  
52  
53  
54  
55  
56  
57  
58  
59  
60

- 1  
2 306 scientific-report/pdfs/scientific-report-of-the-2015-dietary-guidelines-advisory-committee.pdf  
3  
4 307 (accessed April 2016).  
5  
6  
7 308 24. Popkin BM (1993) Nutritional patterns and transitions. *Popul Dev Rev* **19**, 138-57.  
8  
9 309 25. Drewnowski A, Rehm CD (2014) Consumption of added sugars among US children and adults by  
10 food purchase location and food source. *Am J Clin Nutr* **100**, 901-7.  
11 310  
12  
13 311 26. Popkin BM, Nielsen SJ (2003) The sweetening of the world's diet. *Obes Res* **11**, 1325-32.  
14  
15 312 27. Brisbois TD, Marsden SL, Anderson GH *et al.* (2014) Estimated intakes and sources of total and  
16 added sugars in the Canadian diet. *Nutrients* **6**, 1899-912.  
17 313  
18  
19 314 28. Srinivasan CS, Irz X, Shankar B *et al.* (2005) An assessment of the potential consumption impacts  
20 of WHO dietary norms in OECD countries. *Food Policy* **31**, 53-77.  
21 315  
22  
23 316 29. Popkin BM, Hawkes C (2016) Sweetening of the global diet, particularly beverages: patterns,  
24 trends, and policy responses. *Lancet Diabetes Endocrinol* **4**, 174-86.  
25 317  
26  
27 318 30. United States Department of Agriculture (2012) What We Eat in America food categories.  
28 [http://www.ars.usda.gov/SP2UserFiles/Place/80400530/pdf/1112/food\\_category\\_list.pdf](http://www.ars.usda.gov/SP2UserFiles/Place/80400530/pdf/1112/food_category_list.pdf) (accessed  
29 319 December 2015).  
30  
31 320  
32  
33 321 31. Mann J, Fleck F (2014) The science behind the sweetness in our diets. *Bull World Health Organ*  
34 **92**, 780-1.  
35 322  
36  
37 323 32. World Health Organization and the Food and Agriculture Organization of the United States (2003)  
38 WHO Technical Report 916: Diet, nutrition and the prevention of chronic diseases.  
39 324 [http://www.who.int/dietphysicalactivity/publications/trs916/en/gsfao\\_introduction.pdf](http://www.who.int/dietphysicalactivity/publications/trs916/en/gsfao_introduction.pdf) (accessed  
40 325 December 2015).  
41 326  
42  
43 326 33. United States Department of Agriculture (2016) What are added sugars?  
44 <https://www.choosemyplate.gov/what-are-added-sugars> (accessed April 2016).  
45 327  
46  
47 328 34. Harvard T.H. Chan School of Public Health (2015) Added sugar in the diet.  
48 <http://www.hsph.harvard.edu/nutritionsource/carbohydrates/added-sugar-in-the-diet> (accessed  
49 329 December 2015).  
50 330  
51 330  
52 331  
53 331  
54  
55 332 35. SugarScience (2015) 61 names for sugar. [http://www.sugarscience.org/hidden-in-plain-](http://www.sugarscience.org/hidden-in-plain-sight/#.Vm8Wh1UrJaQ)  
56 333 [sight/#.Vm8Wh1UrJaQ](http://www.sugarscience.org/hidden-in-plain-sight/#.Vm8Wh1UrJaQ) (accessed December 2015).  
57  
58  
59  
60

- 1  
2 334 36. United States Food and Drug Administration (2013) Guidance for industry: a food labeling guide.  
3  
4 335 <http://www.fda.gov/Food/GuidanceRegulation/GuidanceDocumentsRegulatoryInformation/LabelingNutrition/ucm064911.htm> (accessed December 2015).  
5  
6 336  
7
- 8 337 37. Government of Canada. Regulations Amending the Food and Drug Regulations (Nutrition  
9  
10 338 Labelling, Nutrient Content Claims and Health Claims). *Canada Gazette Part II*. 2003;137:165  
11  
12 339 (SOR/2003-11). <http://publications.gc.ca/gazette/archives/p2/2003/2003-01-01/pdf/g2-13701.pdf>  
13  
14 340 (accessed December 2015).  
15
- 16 341 38. Institute of Grocery Distribution (2010) Working group report, sugars: improving information and  
17  
18 342 messages to consumers.  
19  
20 343 <http://shoppervista.igd.com/sitecontent/dotcomcontent/samplepages/Sugars%20-%20Improving%20information%20and%20messages%20to%20consumers.pdf> (accessed  
21 344  
22  
23 345 December 2015).  
24
- 25 346 39. Vanderlee L, White CM, Bordes I *et al.* (2015) The efficacy of sugar labeling formats:  
26  
27 347 implications for labeling policy. *Obesity* **23**, 2406-13.  
28
- 29 348 40. U.S. Food and Drug Administration (2015) Proposed changes to the nutrition facts label.  
30  
31 349 <http://www.fda.gov/Food/GuidanceRegulation/GuidanceDocumentsRegulatoryInformation/LabelingNutrition/ucm385663.htm> (accessed December 2015).  
32  
33 350  
34
- 35 351 41. Government of Canada (2015) Proposed food label changes.  
36  
37 352 <http://www.healthycanadians.gc.ca/health-system-systeme-sante/consultations/food-label-etiquette-des-aliments/index-eng.php> (accessed April 2016).  
38  
39 353  
40
- 41 354 42. Government of Canada (2015) Nutrition labelling – table of daily values.  
42  
43 355 <http://healthycanadians.gc.ca/health-system-systeme-sante/consultations/food-label-etiquette-des-aliments/daily-values-valeurs-quotidiennes-eng.php> (accessed January 2016).  
44  
45 356  
46  
47  
48  
49  
50  
51  
52  
53  
54  
55  
56  
57  
58  
59  
60

## 357 TABLES

358 Table 1. Total Sugar and Added Sugar by Food Product Subcategory

|                                                  | Mean TS<br>g (s.d.) | Proportion<br>with AS<br>% | TS among those<br>without AS<br>g (s.d.) | TS among<br>those with AS<br>g (s.d.) | Difference<br>in TS<br>g |
|--------------------------------------------------|---------------------|----------------------------|------------------------------------------|---------------------------------------|--------------------------|
| <b>MILK &amp; DAIRY</b>                          |                     |                            |                                          |                                       |                          |
| All Milk & Cream                                 | 12.5 (8.9)          | 32.5                       | 10.4 (4.3)                               | 17.0 (13.3)                           | 6.6                      |
| Dairy drinks & substitutes                       | 7.9 (6.4)           | 63.1                       | 3.4 (5.2)                                | 10.5 (5.5)                            | 7.1                      |
| Cheese                                           | 0.7 (1.9)           | 10.7                       | 0.4 (1.6)                                | 2.6 (2.8)                             | 2.2                      |
| Yogurt                                           | 14.2 (7.8)          | 73.8                       | 6.1 (3.9)                                | 17.1 (6.7)                            | 11                       |
| <b>PROTEIN FOODS</b>                             |                     |                            |                                          |                                       |                          |
| Red meat & poultry                               | 2.4 (3.8)           | 68.2                       | 0.6 (1.2)                                | 3.2 (4.3)                             | 2.6                      |
| Fish & Seafood                                   | 1.0 (1.9)           | 43.9                       | 0.1 (0.5)                                | 2.2 (2.2)                             | 2.1                      |
| Cured meats                                      | 0.7 (1.8)           | 85.0                       | 0.3 (2.3)                                | 0.8 (1.7)                             | 0.5                      |
| Canned fish/meats                                | 0.8 (4.2)           | 30.5                       | 0.1 (0.4)                                | 2.5 (7.4)                             | 2.4                      |
| Plant-based Protein Foods <sup>a</sup>           | 2.7 (4.0)           | 20.6                       | 1.8 (2.2)                                | 6.1 (6.5)                             | 4.3                      |
| <b>MIXED DISHES</b>                              |                     |                            |                                          |                                       |                          |
| Soups                                            | 3.0 (3.8)           | 78.2                       | 2.1 (4.4)                                | 3.3 (3.5)                             | 1.2                      |
| Pizza                                            | 3.5 (2.1)           | 98.5                       | *                                        | 3.5 (2.2)                             | ---                      |
| Mexican                                          | 2.0 (1.4)           | 75.6                       | 2.0 (1.7)                                | 2.0 (1.3)                             | 0.0                      |
| Frozen dinners/entrees                           | 5.9 (7.3)           | 74.2                       | 2.7 (2.6)                                | 7.1 (8.1)                             | 4.4                      |
| Other mixed dishes                               | 4.9 (6.4)           | 71.4                       | 2.0 (2.2)                                | 6.0 (7.1)                             | 4.0                      |
| <b>GRAINS</b>                                    |                     |                            |                                          |                                       |                          |
| Cereals <sup>b</sup>                             | 8.3 (5.4)           | 85.7                       | 1.2 (2.8)                                | 9.5 (4.8)                             | 8.3                      |
| Grains <sup>c</sup>                              | 1.4 (2.5)           | 17.2                       | 1.2 (2.4)                                | 2.5 (2.9)                             | 1.3                      |
| <b>BAKED GOODS</b>                               |                     |                            |                                          |                                       |                          |
| Breads <sup>d</sup>                              | 2.2 (2.6)           | 70.6                       | 0.8 (1.5)                                | 2.8 (2.8)                             | 2.0                      |
| <b>SNACKS &amp; SWEETS</b>                       |                     |                            |                                          |                                       |                          |
| Savory snacks                                    | 2.6 (4.7)           | 53.5                       | 1.0 (2.7)                                | 3.9 (5.5)                             | 2.9                      |
| Crackers                                         | 1.7 (2.6)           | 68.9                       | 0.5 (1.3)                                | 2.3 (2.8)                             | 1.8                      |
| Snack/meal bars                                  | 10.3 (3.8)          | 99.4                       | *                                        | 10.4 (3.8)                            | ---                      |
| Sweet bakery products                            | 14.1 (9.0)          | 97.7                       | 2.0 (3.7)                                | 14.4 (8.9)                            | 12.4                     |
| Candy                                            | 18.1 (9.0)          | 97.6                       | 6.0 (8.6)                                | 18.4 (8.8)                            | 12.4                     |
| Other desserts                                   | 14.9 (7.3)          | 96.3                       | 3.1 (4.6)                                | 15.4 (7.0)                            | 12.3                     |
| <b>BEVERAGES</b>                                 |                     |                            |                                          |                                       |                          |
| Juice                                            | 22.0 (10.6)         | 79.3                       | 15.9 (12.0)                              | 23.6 (9.6)                            | 7.7                      |
| Pop/Soda, Iced teas                              | 26.5 (18.0)         | 76.8                       | 0.5 (3.2)                                | 34.3 (12.4)                           | 33.8                     |
| Sports drinks, energy drinks,<br>flavoured water | 21.4 (18.0)         | 78.1                       | 3.5 (7.5)                                | 26.5 (16.9)                           | 23.0                     |
| Beverage mixes & crystals                        | 17.0 (4.4)          | 95.8                       | *                                        | 17.4 (4.0)                            | ---                      |
| <b>CONDIMENTS, SAUCES &amp; SPREADS</b>          |                     |                            |                                          |                                       |                          |
| Condiments, sauces & spreads <sup>e</sup>        | 5.7 (7.8)           | 73.1                       | 2.7 (7.3)                                | 6.8 (7.7)                             | 4.1                      |
| <b>INFANT FORMULA &amp; BABY FOOD</b>            |                     |                            |                                          |                                       |                          |

|   |                                  |            |      |            |             |     |
|---|----------------------------------|------------|------|------------|-------------|-----|
| 1 |                                  |            |      |            |             |     |
| 2 |                                  |            |      |            |             |     |
| 3 | Infant formula & baby food       | 6.9 (6.0)  | 47.7 | 5.8 (5.7)  | 8.0 (6.1)   | 2.2 |
| 4 | <b>FRUITS &amp; VEGETABLES</b>   |            |      |            |             |     |
| 5 | Fruits & vegetables <sup>f</sup> | 9.6 (13.4) | 34.8 | 7.6 (14.4) | 13.2 (10.2) | 5.6 |
| 6 | (Packaged/Processed)             |            |      |            |             |     |

7 359

8 360 AS, Added Sugar; TS, Total Sugar.

9 361 \*Categories contain a negligible total ( $\leq 5$  food products)10 362 <sup>a</sup> Includes beans, peas, legumes, nuts, seeds, and processed soy products.11 363 <sup>b</sup> Includes all hot and cold cereals.12 364 <sup>c</sup> Includes products such as pasta and rice.13 365 <sup>d</sup> Includes all varieties of bread products such as rolls, wraps and pitas.14 366 <sup>e</sup> Includes a wide variety of products such as jams, syrups, toppings, honey, gravy and salsa.15 367 <sup>f</sup> Includes only packaged or processed fruit and vegetable products, such as canned fruits and vegetables, dried  
16 368 packaged fruits, and applesauce-type fruit snacks.

Confidential

369 **Table 2.** Frequency of Different Added Sugars (N=40,829)

| Added Sugar               | Total Number<br>of products | % All<br>Products | % Products<br>with added<br>sugar |
|---------------------------|-----------------------------|-------------------|-----------------------------------|
| Sugar (all other)         | 21869                       | 54%               | 81%                               |
| Dextrose                  | 4892                        | 12%               | 18%                               |
| Glucose                   | 3847                        | 9%                | 14%                               |
| Glucose-Fructose          | 3555                        | 9%                | 13%                               |
| Corn Syrup                | 3181                        | 8%                | 12%                               |
| Maltodextrin              | 3015                        | 7%                | 11%                               |
| Fruit Juice Concentrate   | 2278                        | 6%                | 9%                                |
| Honey                     | 1596                        | 4%                | 6%                                |
| Molasses                  | 1486                        | 4%                | 6%                                |
| Syrup (all other)         | 1177                        | 3%                | 4%                                |
| Lactose                   | 885                         | 2%                | 3%                                |
| Fructose                  | 742                         | 2%                | 3%                                |
| Cane Juice                | 706                         | 2%                | 3%                                |
| Malt/Barley Malt          | 400                         | 1%                | 2%                                |
| High-Fructose Corn Syrup  | 361                         | 1%                | 1%                                |
| Caramel                   | 302                         | 1%                | 1%                                |
| Agave                     | 190                         | 1%                | 1%                                |
| Sucrose                   | 125                         | <1%               | 1%                                |
| Date Paste                | 40                          | <1%               | <1%                               |
| Maltose                   | 27                          | <1%               | <1%                               |
| Carob                     | 10                          | <1%               | <1%                               |
| Treacle                   | 7                           | <1%               | <1%                               |
| Ethyl Maltol              | 6                           | <1%               | <1%                               |
| Corn Sweetener            | 4                           | <1%               | <1%                               |
| Nectar (other than agave) | 4                           | <1%               | <1%                               |
| Dextran                   | 0                           | 0%                | 0%                                |
| Diatase                   | 0                           | 0%                | 0%                                |
| Florida Crystals          | 0                           | 0%                | 0%                                |
| Galactose                 | 0                           | 0%                | 0%                                |
| Panocha                   | 0                           | 0%                | 0%                                |

370
